# Supplementary material for: Analysis of the Robustness of Network-Based Disease-Gene Prioritization Methods Reveals Redundancy in the Human Interactome and Functional Diversity of Disease-Genes
Source: PLoS One. 2014 Apr 14;9(4):e94686. doi: 10.1371/journal.pone.0094686 (PMC3986215; doi:10.1371/journal.pone.0094686)
Supplement: Table S1 — The number of genes associated with the diseases used in this study and the number of gene products corresponding to these genes in the interaction networks. (XLS) [file pone.0094686.s007.xls]

## Sheet: Sheet1
	# of genes	# of gene products covered by the largest component (LCC) of the interaction network
Phenotype		bPPI	Goh
alzheimer	48	18	17
anemia	129	73	54
ataxia	131	44	30
breast cancer	70	35	29
cardiomyopathy	138	51	43
cataract	85	25	20
diabetes	182	70	63
epilepsy	139	33	26
hypertension	51	19	15
leukemia	162	102	75
lung cancer	43	22	16
lymphoma	39	23	22
mental retardation	257	64	46
myopathy	102	38	30
obesity	59	25	22
parkinson disease	52	16	13
prostate cancer	63	25	23
schizophrenia	45	19	13
systemic lupus erythematosus	43	21	14
