# Supplementary material for: Analysis of the Robustness of Network-Based Disease-Gene Prioritization Methods Reveals Redundancy in the Human Interactome and Functional Diversity of Disease-Genes
Source: PLoS One. 2014 Apr 14;9(4):e94686. doi: 10.1371/journal.pone.0094686 (PMC3986215; doi:10.1371/journal.pone.0094686)
Supplement: Table S4 — GO term enrichment of the genes in the largest connected component of the differential network for breast cancer. (XLS) [file pone.0094686.s010.xls]

## Sheet: bc_module_go_terms
# of genes	# of total genes	Log of odds ratio	P-value	Adjusted p-value	GO term ID	Go term name
7	8	1.68042	0	0.00133	GO:0007172	signal complex assembly
11	19	1.11432	0	0.00067	GO:0070491	repressing transcription factor binding
8	14	1.09818	1e-05	0.02467	GO:0050732	negative regulation of peptidyl-tyrosine phosphorylation
22	41	1.05002	0	<0.00067	GO:0004715	non-membrane spanning protein tyrosine kinase activity
11	21	1.02244	0	0.002	GO:0060330	regulation of response to interferon-gamma
11	21	1.02244	0	0.002	GO:0060334	regulation of interferon-gamma-mediated signaling pathway
10	21	0.94289	1e-05	0.01333	GO:0050853	B cell receptor signaling pathway
9	19	0.9385	2e-05	0.04733	GO:0005689	U12-type spliceosomal complex
9	19	0.9385	2e-05	0.04733	GO:0030879	mammary gland development
11	24	0.91315	0	0.00667	GO:0018107	peptidyl-threonine phosphorylation
11	24	0.91315	0	0.00667	GO:0033613	activating transcription factor binding
15	34	0.88473	0	0.00067	GO:0045768	positive regulation of anti-apoptosis
10	23	0.87315	2e-05	0.042	GO:0000080	G1 phase of mitotic cell cycle
32	75	0.86501	0	<0.00067	GO:0050852	T cell receptor signaling pathway
11	26	0.85305	1e-05	0.02267	GO:0018210	peptidyl-threonine modification
39	94	0.84681	0	<0.00067	GO:0050851	antigen receptor-mediated signaling pathway
18	43	0.84623	0	<0.00067	GO:0045767	regulation of anti-apoptosis
11	27	0.82585	2e-05	0.03133	GO:0042169	SH2 domain binding
12	30	0.81276	1e-05	0.02067	GO:0016592	mediator complex
28	71	0.80598	0	<0.00067	GO:0007173	epidermal growth factor receptor signaling pathway
13	33	0.80198	0	0.00733	GO:0007249	I-kappaB kinase/NF-kappaB cascade
39	101	0.79487	0	<0.00067	GO:0002429	immune response-activating cell surface receptor signaling pathway
22	57	0.78901	0	<0.00067	GO:0034138	toll-like receptor 3 signaling pathway
40	105	0.78572	0	<0.00067	GO:0002768	immune response-regulating cell surface receptor signaling pathway
22	59	0.76511	0	<0.00067	GO:0002756	MyD88-independent toll-like receptor signaling pathway
14	39	0.73847	1e-05	0.01133	GO:0030521	androgen receptor signaling pathway
18	51	0.72732	0	0.00133	GO:0006921	cellular component disassembly involved in apoptosis
14	40	0.72171	1e-05	0.02133	GO:0000186	activation of MAPKK activity
14	40	0.72171	1e-05	0.02133	GO:0031056	regulation of histone modification
22	63	0.72089	0	0.00067	GO:0048015	phosphatidylinositol-mediated signaling
22	63	0.72089	0	0.00067	GO:0048017	inositol lipid-mediated signaling
19	55	0.71327	0	0.00133	GO:0019903	protein phosphatase binding
15	44	0.70443	1e-05	0.01133	GO:0030177	positive regulation of Wnt receptor signaling pathway
22	65	0.70035	0	0.00067	GO:0019902	phosphatase binding
23	68	0.7001	0	0.00067	GO:0008543	fibroblast growth factor receptor signaling pathway
56	169	0.69723	0	<0.00067	GO:0002757	immune response-activating signal transduction
57	173	0.69388	0	<0.00067	GO:0002764	immune response-regulating signaling pathway
15	45	0.68991	1e-05	0.02067	GO:0018108	peptidyl-tyrosine phosphorylation
17	52	0.67741	0	0.006	GO:0046332	SMAD binding
15	46	0.67584	1e-05	0.02467	GO:0018212	peptidyl-tyrosine modification
22	68	0.67123	0	0.00067	GO:0034142	toll-like receptor 4 signaling pathway
21	65	0.67019	0	0.00067	GO:0006367	transcription initiation from RNA polymerase II promoter
20	62	0.66908	0	0.00133	GO:0030518	steroid hormone receptor signaling pathway
15	47	0.66222	2e-05	0.03133	GO:0016605	PML body
22	70	0.65284	0	0.00067	GO:0008063	Toll signaling pathway
20	64	0.64901	0	0.002	GO:0031294	lymphocyte costimulation
20	64	0.64901	0	0.002	GO:0031295	T cell costimulation
15	48	0.64901	2e-05	0.044	GO:0070555	response to interleukin-1
20	65	0.63931	0	0.002	GO:0051147	regulation of muscle cell differentiation
16	52	0.63925	2e-05	0.02933	GO:0043506	regulation of JUN kinase activity
19	62	0.63672	0	0.006	GO:0060759	regulation of response to cytokine stimulus
44	145	0.63658	0	<0.00067	GO:0004713	protein tyrosine kinase activity
18	59	0.63391	1e-05	0.00867	GO:0019058	viral infectious cycle
30	99	0.63161	0	<0.00067	GO:0005057	receptor signaling protein activity
19	63	0.6268	0	0.006	GO:0034130	toll-like receptor 1 signaling pathway
19	63	0.6268	0	0.006	GO:0034134	toll-like receptor 2 signaling pathway
20	67	0.62052	0	0.00533	GO:0002755	MyD88-dependent toll-like receptor signaling pathway
32	108	0.61815	0	<0.00067	GO:0006469	negative regulation of protein kinase activity
34	115	0.61734	0	<0.00067	GO:0033673	negative regulation of kinase activity
18	61	0.61337	1e-05	0.02067	GO:0048634	regulation of muscle organ development
23	78	0.61331	0	0.00133	GO:0002224	toll-like receptor signaling pathway
19	65	0.6076	1e-05	0.01	GO:0033044	regulation of chromosome organization
63	221	0.60422	0	<0.00067	GO:0002253	activation of immune response
35	121	0.60413	0	<0.00067	GO:0051348	negative regulation of transferase activity
17	59	0.59889	2e-05	0.04333	GO:0016202	regulation of striated muscle tissue development
24	85	0.58701	0	0.00133	GO:0002221	pattern recognition receptor signaling pathway
25	90	0.57731	0	0.00133	GO:0006352	transcription initiation, DNA-dependent
20	72	0.5768	1e-05	0.01333	GO:0008629	induction of apoptosis by intracellular signals
39	142	0.57371	0	<0.00067	GO:0050870	positive regulation of T cell activation
24	87	0.57301	0	0.002	GO:0002758	innate immune response-activating signal transduction
28	102	0.57073	0	0.00067	GO:0002218	activation of innate immune response
26	95	0.56857	0	0.00133	GO:0030308	negative regulation of cell growth
48	178	0.56535	0	<0.00067	GO:0051251	positive regulation of lymphocyte activation
30	111	0.56182	0	0.00067	GO:0008286	insulin receptor signaling pathway
33	124	0.55329	0	0.00067	GO:0030522	intracellular receptor mediated signaling pathway
23	87	0.54758	0	0.00667	GO:0035257	nuclear hormone receptor binding
36	137	0.54648	0	<0.00067	GO:0071845	cellular component disassembly at cellular level
87	341	0.54541	0	<0.00067	GO:0010467	gene expression
36	138	0.54217	0	<0.00067	GO:0022411	cellular component disassembly
46	178	0.53934	0	<0.00067	GO:0050863	regulation of T cell activation
26	100	0.53814	0	0.002	GO:0009612	response to mechanical stimulus
51	200	0.53294	0	<0.00067	GO:0048011	nerve growth factor receptor signaling pathway
26	102	0.52653	0	0.004	GO:0051427	hormone receptor binding
33	130	0.5254	0	0.00067	GO:0034330	cell junction organization
69	277	0.52488	0	<0.00067	GO:0050778	positive regulation of immune response
49	196	0.52067	0	<0.00067	GO:0002696	positive regulation of leukocyte activation
54	217	0.51946	0	<0.00067	GO:0003713	transcription coactivator activity
36	144	0.51716	0	0.00067	GO:0032869	cellular response to insulin stimulus
116	491	0.51018	0	<0.00067	GO:0004672	protein kinase activity
49	201	0.50593	0	<0.00067	GO:0050867	positive regulation of cell activation
41	168	0.50437	0	<0.00067	GO:0045088	regulation of innate immune response
175	780	0.50214	0	<0.00067	GO:0005654	nucleoplasm
62	258	0.50151	0	<0.00067	GO:0007243	intracellular protein kinase cascade
27	111	0.49951	0	0.00667	GO:0005681	spliceosomal complex
33	136	0.49915	0	0.00133	GO:0045121	membrane raft
26	107	0.49878	1e-05	0.00867	GO:0007050	cell cycle arrest
26	107	0.49878	1e-05	0.00867	GO:0050730	regulation of peptidyl-tyrosine phosphorylation
30	125	0.49226	0	0.002	GO:0045089	positive regulation of innate immune response
23	96	0.4904	2e-05	0.048	GO:0017124	SH3 domain binding
30	126	0.48768	0	0.00267	GO:0043235	receptor complex
25	105	0.48699	1e-05	0.02467	GO:0042110	T cell activation
29	122	0.48658	0	0.006	GO:0051098	regulation of binding
115	507	0.48575	0	<0.00067	GO:0006468	protein phosphorylation
54	231	0.48306	0	<0.00067	GO:0051249	regulation of lymphocyte activation
66	285	0.48126	0	<0.00067	GO:0019900	kinase binding
124	555	0.48011	0	<0.00067	GO:0016773	phosphotransferase activity, alcohol group as acceptor
123	551	0.47924	0	<0.00067	GO:0016310	phosphorylation
57	247	0.4765	0	<0.00067	GO:0019901	protein kinase binding
74	324	0.47578	0	<0.00067	GO:0044419	interspecies interaction between organisms
28	121	0.4711	1e-05	0.01133	GO:0043566	structure-specific DNA binding
44	192	0.4689	0	0.00067	GO:0000975	regulatory region DNA binding
44	192	0.4689	0	0.00067	GO:0001067	regulatory region nucleic acid binding
128	586	0.46829	0	<0.00067	GO:0016301	kinase activity
42	184	0.46614	0	0.00067	GO:0044212	transcription regulatory region DNA binding
93	421	0.4627	0	<0.00067	GO:0002684	positive regulation of immune system process
95	431	0.46209	0	<0.00067	GO:0007169	transmembrane receptor protein tyrosine kinase signaling pathway
84	379	0.46165	0	<0.00067	GO:0000988	protein binding transcription factor activity
30	132	0.46118	0	0.00733	GO:0043406	positive regulation of MAP kinase activity
92	420	0.45749	0	<0.00067	GO:0050776	regulation of immune response
115	533	0.45651	0	<0.00067	GO:0007167	enzyme linked receptor protein signaling pathway
61	275	0.45499	0	<0.00067	GO:0008134	transcription factor binding
82	375	0.45324	0	<0.00067	GO:0000989	transcription factor binding transcription factor activity
41	184	0.45221	0	0.00067	GO:0032868	response to insulin stimulus
40	180	0.45044	0	0.00067	GO:0043405	regulation of MAP kinase activity
82	377	0.45019	0	<0.00067	GO:0010627	regulation of intracellular protein kinase cascade
59	268	0.4501	0	<0.00067	GO:0071900	regulation of protein serine/threonine kinase activity
80	368	0.44925	0	<0.00067	GO:0003712	transcription cofactor activity
47	213	0.44814	0	0.00067	GO:0030168	platelet activation
29	131	0.44621	1e-05	0.02333	GO:0010638	positive regulation of organelle organization
58	266	0.44436	0	<0.00067	GO:0002694	regulation of leukocyte activation
95	446	0.44236	0	<0.00067	GO:0043549	regulation of kinase activity
29	132	0.44194	1e-05	0.02467	GO:0005912	adherens junction
679	5173	0.44169	0	<0.00067	GO:0005515	protein binding
63	292	0.43979	0	<0.00067	GO:0034097	response to cytokine stimulus
36	165	0.43924	0	0.002	GO:0014070	response to organic cyclic compound
36	165	0.43924	0	0.002	GO:0051272	positive regulation of cellular component movement
42	193	0.43908	0	0.00067	GO:0071375	cellular response to peptide hormone stimulus
31	142	0.43868	1e-05	0.01933	GO:0000375	RNA splicing, via transesterification reactions
96	455	0.43723	0	<0.00067	GO:0051338	regulation of transferase activity
60	279	0.43709	0	<0.00067	GO:0050865	regulation of cell activation
56	260	0.43684	0	<0.00067	GO:0006366	transcription from RNA polymerase II promoter
74	347	0.43643	0	<0.00067	GO:0004674	protein serine/threonine kinase activity
90	426	0.43606	0	<0.00067	GO:0045859	regulation of protein kinase activity
28	129	0.43504	2e-05	0.04733	GO:0032147	activation of protein kinase activity
135	658	0.4342	0	<0.00067	GO:0006793	phosphorus metabolic process
135	658	0.4342	0	<0.00067	GO:0006796	phosphate metabolic process
67	315	0.43286	0	<0.00067	GO:0051130	positive regulation of cellular component organization
43	200	0.43251	0	0.00067	GO:0001558	regulation of cell growth
40	186	0.43197	0	0.00133	GO:0005667	transcription factor complex
125	610	0.43005	0	<0.00067	GO:0042325	regulation of phosphorylation
136	669	0.4292	0	<0.00067	GO:0016772	transferase activity, transferring phosphorus-containing groups
30	140	0.42813	2e-05	0.02933	GO:0051052	regulation of DNA metabolic process
93	449	0.4257	0	<0.00067	GO:0009967	positive regulation of signal transduction
117	574	0.4243	0	<0.00067	GO:0001932	regulation of protein phosphorylation
146	729	0.424	0	<0.00067	GO:0048584	positive regulation of response to stimulus
31	146	0.42317	1e-05	0.028	GO:0070161	anchoring junction
127	631	0.42034	0	<0.00067	GO:0019220	regulation of phosphate metabolic process
127	631	0.42034	0	<0.00067	GO:0051174	regulation of phosphorus metabolic process
85	414	0.41821	0	<0.00067	GO:0019904	protein domain specific binding
97	477	0.41648	0	<0.00067	GO:0023056	positive regulation of signaling
59	285	0.41534	0	<0.00067	GO:0043434	response to peptide hormone stimulus
40	192	0.41423	0	0.002	GO:0016604	nuclear body
53	256	0.41379	0	0.00067	GO:0010740	positive regulation of intracellular protein kinase cascade
116	580	0.41306	0	<0.00067	GO:0044451	nucleoplasm part
40	193	0.41134	0	0.00267	GO:0045786	negative regulation of cell cycle
75	368	0.41105	0	<0.00067	GO:0008285	negative regulation of cell proliferation
42	203	0.4108	0	0.002	GO:0032403	protein complex binding
89	441	0.40968	0	<0.00067	GO:0071822	protein complex subunit organization
36	174	0.4096	1e-05	0.01	GO:0031349	positive regulation of defense response
53	259	0.40728	0	0.00067	GO:0034622	cellular macromolecular complex assembly
95	475	0.4064	0	<0.00067	GO:0010647	positive regulation of cell communication
43	210	0.40526	0	0.002	GO:0043408	regulation of MAPKKK cascade
147	760	0.40412	0	<0.00067	GO:0032774	RNA biosynthetic process
33	161	0.40391	2e-05	0.03067	GO:0071902	positive regulation of protein serine/threonine kinase activity
42	206	0.40266	0	0.002	GO:0010562	positive regulation of phosphorus metabolic process
42	206	0.40266	0	0.002	GO:0045937	positive regulation of phosphate metabolic process
69	344	0.40038	0	<0.00067	GO:0034621	cellular macromolecular complex subunit organization
146	760	0.39983	0	<0.00067	GO:0019899	enzyme binding
55	273	0.39909	0	0.00067	GO:0018193	peptidyl-amino acid modification
86	434	0.39844	0	<0.00067	GO:0045944	positive regulation of transcription from RNA polymerase II promoter
445	2853	0.39724	0	<0.00067	GO:0044260	cellular macromolecule metabolic process
40	198	0.39716	0	0.006	GO:0042327	positive regulation of phosphorylation
292	1677	0.39596	0	<0.00067	GO:0044428	nuclear part
88	447	0.39536	0	<0.00067	GO:0043068	positive regulation of programmed cell death
35	174	0.39386	1e-05	0.028	GO:0046649	lymphocyte activation
101	519	0.39274	0	<0.00067	GO:0065003	macromolecular complex assembly
87	444	0.39242	0	<0.00067	GO:0043065	positive regulation of apoptosis
137	720	0.39133	0	<0.00067	GO:0031399	regulation of protein modification process
194	1055	0.39097	0	<0.00067	GO:0009966	regulation of signal transduction
36	181	0.38782	1e-05	0.028	GO:0001934	positive regulation of protein phosphorylation
82	421	0.38759	0	<0.00067	GO:0001775	cell activation
116	608	0.38614	0	<0.00067	GO:0071310	cellular response to organic substance
89	460	0.38588	0	<0.00067	GO:0010942	positive regulation of cell death
65	332	0.38577	0	<0.00067	GO:0045597	positive regulation of cell differentiation
117	614	0.38575	0	<0.00067	GO:0043933	macromolecular complex subunit organization
58	296	0.38442	0	0.00067	GO:0006917	induction of apoptosis
41	208	0.38381	0	0.00733	GO:0044087	regulation of cellular component biogenesis
285	1667	0.38161	0	<0.00067	GO:0005829	cytosol
58	298	0.38069	0	0.00067	GO:0012502	induction of programmed cell death
62	320	0.37919	0	0.00067	GO:0071495	cellular response to endogenous stimulus
85	444	0.37878	0	<0.00067	GO:0051094	positive regulation of developmental process
73	381	0.37591	0	<0.00067	GO:0006461	protein complex assembly
48	248	0.37524	0	0.002	GO:0048545	response to steroid hormone stimulus
157	864	0.37133	0	<0.00067	GO:0031328	positive regulation of cellular biosynthetic process
159	876	0.37133	0	<0.00067	GO:0009891	positive regulation of biosynthetic process
41	213	0.37077	1e-05	0.01933	GO:0045321	leukocyte activation
158	872	0.37	0	<0.00067	GO:0032268	regulation of cellular protein metabolic process
134	730	0.36977	0	<0.00067	GO:0051254	positive regulation of RNA metabolic process
65	342	0.36931	0	0.00067	GO:0040008	regulation of growth
144	790	0.36892	0	<0.00067	GO:0010557	positive regulation of macromolecule biosynthetic process
172	959	0.36871	0	<0.00067	GO:0034645	cellular macromolecule biosynthetic process
126	685	0.36846	0	<0.00067	GO:0045893	positive regulation of transcription, DNA-dependent
124	675	0.36711	0	<0.00067	GO:0006351	transcription, DNA-dependent
174	974	0.36707	0	<0.00067	GO:0009059	macromolecule biosynthetic process
132	723	0.36606	0	<0.00067	GO:0010628	positive regulation of gene expression
77	410	0.36586	0	<0.00067	GO:0007599	hemostasis
40	210	0.36484	1e-05	0.028	GO:0051090	regulation of sequence-specific DNA binding transcription factor activity
465	3166	0.36475	0	<0.00067	GO:0043170	macromolecule metabolic process
147	814	0.36453	0	<0.00067	GO:0042127	regulation of cell proliferation
120	655	0.36435	0	<0.00067	GO:0002682	regulation of immune system process
170	954	0.36428	0	<0.00067	GO:0051246	regulation of protein metabolic process
58	307	0.36426	0	0.00067	GO:0033043	regulation of organelle organization
76	406	0.36378	0	<0.00067	GO:0007596	blood coagulation
76	406	0.36378	0	<0.00067	GO:0050817	coagulation
52	275	0.36334	0	0.002	GO:0032870	cellular response to hormone stimulus
41	216	0.36313	1e-05	0.02467	GO:0032989	cellular component morphogenesis
138	763	0.36257	0	<0.00067	GO:0070887	cellular response to chemical stimulus
97	525	0.36233	0	<0.00067	GO:0009725	response to hormone stimulus
213	1235	0.35969	0	<0.00067	GO:0023051	regulation of signaling
341	2144	0.35906	0	<0.00067	GO:0048522	positive regulation of cellular process
198	1141	0.35815	0	<0.00067	GO:0010604	positive regulation of macromolecule metabolic process
366	2349	0.35652	0	<0.00067	GO:0048518	positive regulation of biological process
146	821	0.35539	0	<0.00067	GO:0051173	positive regulation of nitrogen compound metabolic process
97	532	0.35492	0	<0.00067	GO:0051726	regulation of cell cycle
247	1475	0.35412	0	<0.00067	GO:0048583	regulation of response to stimulus
54	292	0.3516	0	0.002	GO:0033674	positive regulation of kinase activity
142	803	0.35094	0	<0.00067	GO:0045935	positive regulation of nucleobase, nucleoside, nucleotide and nucleic acid metabolic process
200	1170	0.34994	0	<0.00067	GO:0031325	positive regulation of cellular metabolic process
166	954	0.34917	0	<0.00067	GO:0016740	transferase activity
208	1225	0.34868	0	<0.00067	GO:0009893	positive regulation of metabolic process
247	1489	0.34837	0	<0.00067	GO:0044267	cellular protein metabolic process
56	305	0.34813	0	0.002	GO:0031347	regulation of defense response
399	2652	0.34796	0	<0.00067	GO:0060255	regulation of macromolecule metabolic process
138	783	0.34781	0	<0.00067	GO:0022607	cellular component assembly
159	913	0.34744	0	<0.00067	GO:0010646	regulation of cell communication
414	2783	0.34727	0	<0.00067	GO:0080090	regulation of primary metabolic process
51	278	0.34656	0	0.006	GO:0045860	positive regulation of protein kinase activity
205	1210	0.34635	0	<0.00067	GO:0016070	RNA metabolic process
760	6824	0.34546	0	<0.00067	GO:0044424	intracellular part
106	594	0.34544	0	<0.00067	GO:0009719	response to endogenous stimulus
833	8079	0.34444	0	<0.00067	GO:0008150	biological_process
417	2822	0.344	0	<0.00067	GO:0031323	regulation of cellular metabolic process
57	313	0.34388	0	0.002	GO:0031401	positive regulation of protein modification process
97	543	0.3435	0	<0.00067	GO:0071844	cellular component assembly at cellular level
54	297	0.34233	0	0.004	GO:0051347	positive regulation of transferase activity
186	1094	0.34213	0	<0.00067	GO:0010033	response to organic substance
77	428	0.34209	0	<0.00067	GO:0016071	mRNA metabolic process
87	486	0.34195	0	<0.00067	GO:0080134	regulation of response to stress
228	1374	0.34184	0	<0.00067	GO:0007166	cell surface receptor linked signaling pathway
627	5017	0.33735	0	<0.00067	GO:0050794	regulation of cellular process
82	461	0.33711	0	<0.00067	GO:0008284	positive regulation of cell proliferation
83	467	0.33692	0	<0.00067	GO:0050878	regulation of body fluid levels
315	2017	0.33646	0	<0.00067	GO:0010556	regulation of macromolecule biosynthetic process
62	346	0.33621	0	0.00133	GO:0009968	negative regulation of signal transduction
67	375	0.33579	0	0.00067	GO:0008283	cell proliferation
444	3101	0.33471	0	<0.00067	GO:0019222	regulation of metabolic process
134	780	0.33208	0	<0.00067	GO:0051128	regulation of cellular component organization
164	970	0.33194	0	<0.00067	GO:0035556	intracellular signal transduction
782	7235	0.33078	0	<0.00067	GO:0005488	binding
203	1229	0.33068	0	<0.00067	GO:0006464	protein modification process
251	1562	0.33042	0	<0.00067	GO:0090304	nucleic acid metabolic process
305	1962	0.32961	0	<0.00067	GO:2000112	regulation of cellular macromolecule biosynthetic process
74	421	0.32855	0	0.00067	GO:0051247	positive regulation of protein metabolic process
210	1281	0.32851	0	<0.00067	GO:0043412	macromolecule modification
92	528	0.32832	0	<0.00067	GO:0012501	programmed cell death
331	2171	0.32729	0	<0.00067	GO:0009889	regulation of biosynthetic process
72	411	0.32622	0	0.00067	GO:0009628	response to abiotic stimulus
135	795	0.3258	0	<0.00067	GO:0006357	regulation of transcription from RNA polymerase II promoter
108	628	0.32533	0	<0.00067	GO:0008219	cell death
65	371	0.32462	0	0.00133	GO:0032270	positive regulation of cellular protein metabolic process
327	2149	0.32441	0	<0.00067	GO:0031326	regulation of cellular biosynthetic process
316	2063	0.3244	0	<0.00067	GO:0010468	regulation of gene expression
55	313	0.324	0	0.00733	GO:0000122	negative regulation of transcription from RNA polymerase II promoter
154	921	0.32256	0	<0.00067	GO:0010941	regulation of cell death
89	516	0.32193	0	<0.00067	GO:0006915	apoptosis
108	632	0.32179	0	<0.00067	GO:0010558	negative regulation of macromolecule biosynthetic process
95	553	0.32126	0	<0.00067	GO:0051253	negative regulation of RNA metabolic process
108	633	0.32091	0	<0.00067	GO:0016265	death
104	609	0.32034	0	<0.00067	GO:2000113	negative regulation of cellular macromolecule biosynthetic process
150	899	0.32016	0	<0.00067	GO:0043067	regulation of programmed cell death
469	3402	0.31919	0	<0.00067	GO:0005634	nucleus
763	6980	0.31836	0	<0.00067	GO:0009987	cellular process
72	418	0.31699	0	0.00133	GO:0060548	negative regulation of cell death
327	2175	0.31659	0	<0.00067	GO:0019219	regulation of nucleobase, nucleoside, nucleotide and nucleic acid metabolic process
100	589	0.31605	0	<0.00067	GO:0010629	negative regulation of gene expression
102	602	0.31545	0	<0.00067	GO:0045934	negative regulation of nucleobase, nucleoside, nucleotide and nucleic acid metabolic process
278	1801	0.31516	0	<0.00067	GO:0006355	regulation of transcription, DNA-dependent
92	541	0.31488	0	<0.00067	GO:0045892	negative regulation of transcription, DNA-dependent
65	378	0.31445	0	0.002	GO:0023057	negative regulation of signaling
285	1856	0.3144	0	<0.00067	GO:0051252	regulation of RNA metabolic process
139	838	0.31364	0	<0.00067	GO:0010605	negative regulation of macromolecule metabolic process
106	631	0.31174	0	<0.00067	GO:0045595	regulation of cell differentiation
147	893	0.31159	0	<0.00067	GO:0042981	regulation of apoptosis
101	600	0.31157	0	<0.00067	GO:0051704	multi-organism process
102	607	0.31086	0	<0.00067	GO:0051172	negative regulation of nitrogen compound metabolic process
332	2240	0.3092	0	<0.00067	GO:0051171	regulation of nitrogen compound metabolic process
77	455	0.30852	0	0.00067	GO:0044092	negative regulation of molecular function
637	5290	0.30686	0	<0.00067	GO:0050789	regulation of biological process
64	378	0.30581	0	0.006	GO:0010648	negative regulation of cell communication
99	594	0.30555	0	<0.00067	GO:0022402	cell cycle process
110	664	0.30504	0	<0.00067	GO:0009890	negative regulation of biosynthetic process
275	1808	0.30492	0	<0.00067	GO:0048523	negative regulation of cellular process
68	403	0.30484	0	0.00267	GO:0043069	negative regulation of programmed cell death
56	331	0.30372	1e-05	0.02467	GO:0044427	chromosomal part
499	3772	0.30265	0	<0.00067	GO:0044237	cellular metabolic process
320	2166	0.30255	0	<0.00067	GO:0016043	cellular component organization
67	399	0.30199	0	0.00467	GO:0043066	negative regulation of apoptosis
321	2181	0.30047	0	<0.00067	GO:0071840	cellular component organization or biogenesis
144	891	0.30031	0	<0.00067	GO:0009892	negative regulation of metabolic process
416	2994	0.29957	0	<0.00067	GO:0051716	cellular response to stimulus
107	652	0.29904	0	<0.00067	GO:0031327	negative regulation of cellular biosynthetic process
294	1978	0.29705	0	<0.00067	GO:0048519	negative regulation of biological process
91	553	0.29655	0	0.00067	GO:0006928	cellular component movement
827	8104	0.29328	0	<0.00067	GO:0044464	cell part
132	823	0.29276	0	<0.00067	GO:0031324	negative regulation of cellular metabolic process
113	699	0.29222	0	<0.00067	GO:2000026	regulation of multicellular organismal development
500	3833	0.29177	0	<0.00067	GO:0044238	primary metabolic process
251	1665	0.29139	0	<0.00067	GO:0071842	cellular component organization at cellular level
829	8148	0.28928	0	<0.00067	GO:0003674	molecular_function
252	1680	0.28865	0	<0.00067	GO:0071841	cellular component organization or biogenesis at cellular level
650	5544	0.28801	0	<0.00067	GO:0065007	biological regulation
353	2491	0.28743	0	<0.00067	GO:0007165	signal transduction
150	954	0.28634	0	<0.00067	GO:0005524	ATP binding
459	3454	0.28606	0	<0.00067	GO:0005737	cytoplasm
139	880	0.286	0	<0.00067	GO:0050793	regulation of developmental process
190	1234	0.28543	0	<0.00067	GO:0065009	regulation of molecular function
268	1820	0.28241	0	<0.00067	GO:0019538	protein metabolic process
103	646	0.2821	0	0.00067	GO:0033554	cellular response to stress
152	975	0.28203	0	<0.00067	GO:0030554	adenyl nucleotide binding
62	384	0.27977	2e-05	0.038	GO:0048870	cell motility
150	970	0.2769	0	<0.00067	GO:0032559	adenyl ribonucleotide binding
273	1879	0.27566	0	<0.00067	GO:0006139	nucleobase, nucleoside, nucleotide and nucleic acid metabolic process
523	4156	0.27385	0	<0.00067	GO:0008152	metabolic process
69	434	0.27288	1e-05	0.02267	GO:0048585	negative regulation of response to stimulus
465	3581	0.2709	0	<0.00067	GO:0044422	organelle part
639	5508	0.26724	0	<0.00067	GO:0043226	organelle
638	5496	0.26718	0	<0.00067	GO:0043229	intracellular organelle
250	1726	0.26659	0	<0.00067	GO:0042221	response to chemical stimulus
68	433	0.26606	2e-05	0.03867	GO:0043565	sequence-specific DNA binding
152	1005	0.26481	0	<0.00067	GO:0050790	regulation of catalytic activity
124	813	0.26259	0	0.00067	GO:0044093	positive regulation of molecular function
100	651	0.26092	0	0.00133	GO:0001071	nucleic acid binding transcription factor activity
100	651	0.26092	0	0.00133	GO:0003700	sequence-specific DNA binding transcription factor activity
72	464	0.26042	2e-05	0.03133	GO:0051336	regulation of hydrolase activity
137	907	0.26032	0	<0.00067	GO:0002376	immune system process
173	1167	0.25877	0	<0.00067	GO:0035639	purine ribonucleoside triphosphate binding
454	3530	0.25851	0	<0.00067	GO:0044446	intracellular organelle part
86	561	0.25674	0	0.00667	GO:0007049	cell cycle
94	616	0.25597	0	0.00267	GO:0042995	cell projection
175	1191	0.25417	0	<0.00067	GO:0017076	purine nucleotide binding
103	683	0.25149	0	0.002	GO:0043085	positive regulation of catalytic activity
173	1185	0.24995	0	<0.00067	GO:0032555	purine ribonucleotide binding
173	1186	0.24946	0	<0.00067	GO:0032553	ribonucleotide binding
198	1373	0.24927	0	<0.00067	GO:0044249	cellular biosynthetic process
486	3907	0.24594	0	<0.00067	GO:0050896	response to stimulus
334	2484	0.24544	0	<0.00067	GO:0032991	macromolecular complex
112	754	0.24517	0	0.00133	GO:0009653	anatomical structure morphogenesis
115	776	0.24455	0	0.00133	GO:0009605	response to external stimulus
203	1426	0.24296	0	<0.00067	GO:0009058	biosynthetic process
285	2082	0.24182	0	<0.00067	GO:0034641	cellular nitrogen compound metabolic process
103	698	0.2396	0	0.006	GO:0040011	locomotion
289	2123	0.23946	0	<0.00067	GO:0006807	nitrogen compound metabolic process
200	1416	0.23756	0	<0.00067	GO:0000166	nucleotide binding
206	1464	0.23686	0	<0.00067	GO:0006950	response to stress
88	599	0.23411	2e-05	0.03667	GO:0046907	intracellular transport
162	1138	0.23278	0	0.00067	GO:0051239	regulation of multicellular organismal process
185	1317	0.23061	0	<0.00067	GO:0003677	DNA binding
126	878	0.22918	0	0.002	GO:0032879	regulation of localization
90	621	0.22714	2e-05	0.048	GO:0048513	organ development
574	4964	0.22261	0	<0.00067	GO:0043231	intracellular membrane-bounded organelle
574	4967	0.222	0	<0.00067	GO:0043227	membrane-bounded organelle
244	1823	0.21646	0	<0.00067	GO:0003676	nucleic acid binding
279	2117	0.21597	0	<0.00067	GO:0043234	protein complex
203	1501	0.21267	0	<0.00067	GO:0048856	anatomical structure development
198	1463	0.21192	0	0.00067	GO:0043228	non-membrane-bounded organelle
198	1463	0.21192	0	0.00067	GO:0043232	intracellular non-membrane-bounded organelle
114	820	0.20917	1e-05	0.02467	GO:0005102	receptor binding
156	1168	0.19516	0	0.006	GO:0048869	cellular developmental process
150	1127	0.19198	1e-05	0.01	GO:0006996	organelle organization
302	2440	0.18122	0	0.00067	GO:0032502	developmental process
184	1434	0.17768	0	0.00733	GO:0065008	regulation of biological quality
436	3808	0.15998	0	0.00067	GO:0044444	cytoplasmic part
