# Supplementary material for: Analysis of the Robustness of Network-Based Disease-Gene Prioritization Methods Reveals Redundancy in the Human Interactome and Functional Diversity of Disease-Genes
Source: PLoS One. 2014 Apr 14;9(4):e94686. doi: 10.1371/journal.pone.0094686 (PMC3986215; doi:10.1371/journal.pone.0094686)
Supplement: Table S6 — The interaction sources used to create the human protein-protein interaction network. (XLS) [file pone.0094686.s012.xls]

## Sheet: Sheet1
Network	Sources	Date of retrieval or version	# of nodes in LCC	# of edges in LCC
Goh [1]	Interactions collected from literature (i.e. large-scale Y2H experiments by Rual et al. [2] and Stelzl et al. [3])	n/a	7279	21911
bPPI network (BIANA [4])	DIP [5]	2009-01-01	11250	59220
	HPRD [6]	2007-09-01
	IntAct [7]	2009-01-01
	MIPS (MPACT) [8]	2008-10-01
	BioGRID [9]	2.0.49
* References
1. Goh KI, Cusick ME, Valle D, Childs B, Vidal M, et al. (2007) The human disease network. Proc Natl Acad Sci U S A 104: 8685.
2. Rual JF, Venkatesan K, Hao T, Hirozane-Kishikawa T, Dricot A, et al. (2005) Towards a proteome-scale map of the human protein-protein interaction network. Nature 437: 1173–1178.
3. Stelzl U, Worm U, Lalowski M, Haenig C, Brembeck FH, et al. (2005) A human protein-protein interaction network: a resource for annotating the proteome. Cell 122: 957–968.
4. Garcia-Garcia J, Guney E, Aragues R, Planas-Iglesias J, Oliva B (2010) Biana: a software framework for compiling biological interactions and analyzing networks. BMC Bioinformatics 11: 56. doi:10.1186/1471-2105-11-56.
5. Salwinski L, Miller CS, Smith AJ, Pettit FK, Bowie JU, et al. (2004) The database of interacting proteins: 2004 update. Nucleic acids research 32: D449–D451.
6. Prasad TS, Kandasamy K, Pandey A (2009) Human Protein Reference Database and Human Proteinpedia as discovery tools for systems biology. Methods Mol Biol 577: 67–79.
7. Hermjakob H, Montecchi-Palazzi L, Lewington C, Mudali S, Kerrien S, et al. (2004) IntAct: an open source molecular interaction database. Nucleic acids research 32: D452–D455.
8. Guldener U, Munsterkotter M, Oesterheld M, Pagel P, Ruepp A, et al. (2006) MPact: the MIPS protein interaction resource on yeast. Nucleic Acids Res 34: D436–41.
9. Breitkreutz BJ, Stark C, Reguly T, Boucher L, Breitkreutz A, et al. (2008) The BioGRID Interaction Database: 2008 update. Nucleic Acids Res 36: D637–40.
